# Supplementary material for: Computational prediction and validation of C/D, H/ACA and Eh_U3 snoRNAs of Entamoeba histolytica
Source: PubMed Central journal article supplement (PMC3542256; doi:10.1186/1471-2164-13-390), 2012-08-14
Supplement: 1471-2164-13-390-S2.pdf [file 1471-2164-13-390-S2.pdf]

EhCDOrph1 D' box  
AGTC 3' AGAAGAGGTTTTG 5'  
 EHI\_192630 5' TCTTCTCCAAAAC 3'  
 64570 64582

EhCDOrph3 D box  
AGTCT 3' GAGTTCACCTTTCACTTT 5'  
 EHI\_008070 5' CTCAAGTGAAAATTGAAA 3'  
 63165 63182

**Figure S2**
