# Supplementary material for: Computational prediction and validation of C/D, H/ACA and Eh_U3 snoRNAs of Entamoeba histolytica
Source: PubMed Central journal article supplement (PMC3542256; doi:10.1186/1471-2164-13-390), 2012-08-14
Supplement: 1471-2164-13-390-S7.pdf [file 1471-2164-13-390-S7.pdf]

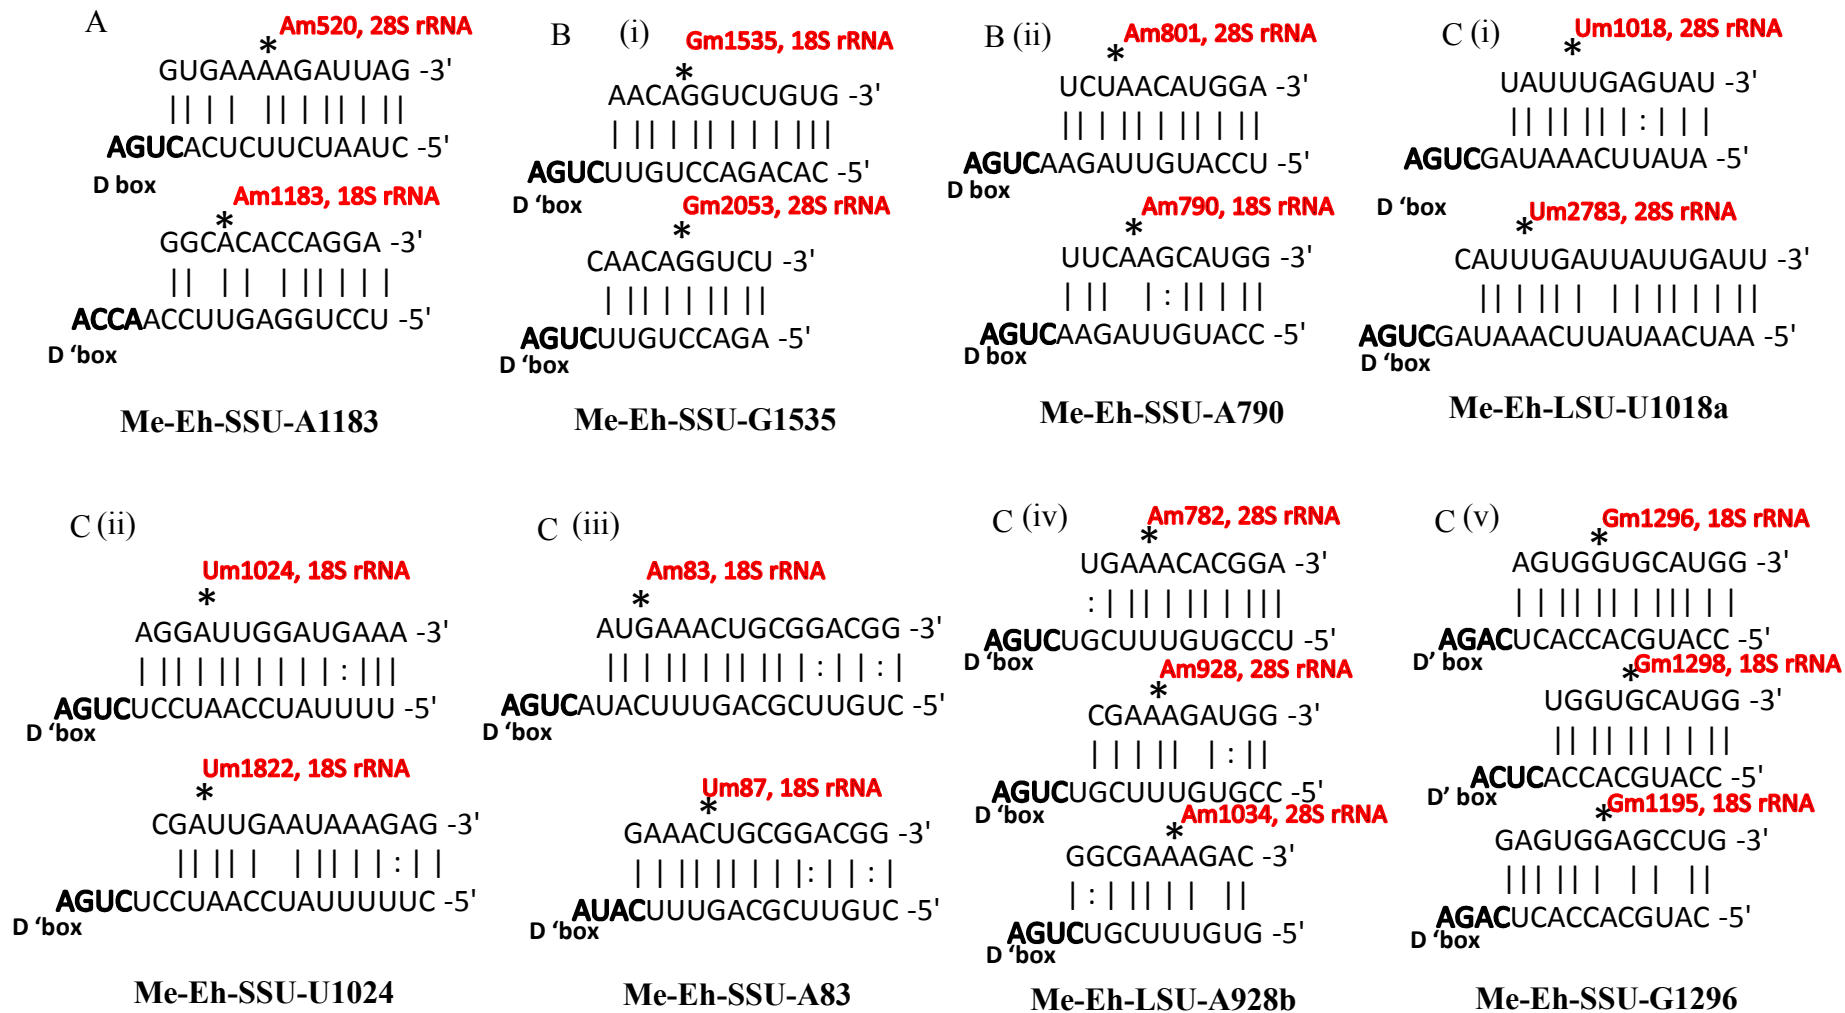

Figure S6
